# Supplementary material for: Long-Term Trends in Stroke Survivors Discharged to Care Homes: The South London Stroke Register
Source: PubMed Central journal article supplement (PMC6924949; doi:10.1161/strokeaha.119.026618), 2019-11-06
Supplement: str-51-179-s001.pdf [file str-51-179-s001.pdf]

## SUPPLEMENTAL MATERIAL

### Long-term trends in stroke survivors discharged to care homes: The South London Stroke Register

Amanda Clery, MSc<sup>1</sup>, Ajay Bhalla, MD<sup>1,2</sup>, Alessandra Bisquera, MSc<sup>1</sup>, Lesli E. Skolarus, MD<sup>1,3</sup>, Iain Marshall, PhD<sup>1</sup>, Christopher McKeivitt, PhD<sup>1</sup>, Anthony Rudd, FRCP (Lond)<sup>1,2</sup>, Catherine Sackley, PhD<sup>1</sup>, Finbarr C. Martin, MD<sup>1</sup>, Jill Manthorpe, MA<sup>4</sup>, Charles Wolfe, MD<sup>1,5,6</sup>, Yanzhong Wang, PhD<sup>1,5,6</sup>

**1** School of Population Health and Environmental Sciences, King's College London, London, United Kingdom **2** Guy's and St Thomas' NHS Foundation Trust, London, United Kingdom **3** Department of Neurology, University of Michigan, Ann Arbor, USA **4** National Institute for Health Research (NIHR) Policy Research Unit in Health and Social Care Workforce, King's College London, London, United Kingdom **5** NIHR Biomedical Research Centre, Guy's and St Thomas' NHS Foundation Trust and King's College London, London, United Kingdom, **6** NIHR Collaboration for Leadership in Applied Health Research and Care (CLAHRC) South London, London, United Kingdom

## Supplemental Methods

### **Missing data (Tables I and II)**

Missing data in the outcome (discharge destination) were summarised by categorising the outcome into missing or non-missing. The characteristics of stroke survivors were then summarised, stratified by this variable (Table I). Categorical variables were summarised using counts and percentages and chi-squared tests. Continuous variables were summarised using means, standard deviations and t-tests or medians, interquartile ranges and Mann-Whitney U-tests tests if non-normal.

The proportion of each variable that was missing was then also summarized, stratified by discharge destination (Table II). Similar statistical methods were used, as described above, to summarise the data.

### **Trends in the characteristics of the whole population of stroke survivors (Table III)**

The statistical methods used here are similar to those used to assess the trends in stroke survivors discharged to care homes in the main results. Chi-squared tests for trend were used to summarise the trend over time in categorical variables and ANOVA for continuous variables (or Kruskal-Wallis if non-normal).

### **The associations between characteristics and discharge destination post-stroke, analysed separately for the 4 cohorts: 1995-2000, 2001-2006, 2007-2012, 2013-2018 (Tables IV-VII)**

The data were divided into the 4 cohorts. In each cohort, missing data in all the variables were re-assessed. Any variables with >3% missing data had an additional missing data category added for analysis. Sample size was restricted for a complete-case analysis. Multivariable logistic regression models were built for all the variables, adjusting for year of stroke, age, sex, ethnicity, pre-stroke living arrangement, type of stroke, stroke severity (GCS), swallow test results, incontinence, pre-stroke BI, post-stroke (7d) BI, admission to a stroke unit, brain imaging, and length of stay in hospital. Results were summarised with odds ratios and 95% confidence intervals. Wald tests were used to obtain p-values for the associations.

## Supplemental Results

Table I. The characteristics of stroke survivors, stratified by missingness in outcome data

| Factor                                      | Missing<br>(N=431) | Non-missing<br>(N=4,172) | P-value |
|---------------------------------------------|--------------------|--------------------------|---------|
| Year of stroke                              |                    |                          | <0.001  |
| 1995-2000                                   | 297 (68.9)         | 840 (20.1)               |         |
| 2001-2006                                   | 75 (17.4)          | 1215 (29.1)              |         |
| 2007-2012                                   | 41 (9.5)           | 1116 (26.7)              |         |
| 2013-2018                                   | 18 (4.2)           | 1001 (24.0)              |         |
| Age (mean (SD))                             | 69.7 (15.5)        | 67.6 (15.3)              | 0.005   |
| Sex: Male                                   | 216 (50.1)         | 2255 (54.1)              | 0.131   |
| Ethnicity                                   |                    |                          | <0.001  |
| White                                       | 318 (76.1)         | 2582 (62.6)              |         |
| Black                                       | 82 (19.6)          | 1246 (30.2)              |         |
| Other                                       | 18 (4.3)           | 294 (7.1)                |         |
| Living alone pre-stroke                     | 61 (36.7)          | 1404 (36.0)              | 0.919   |
| <b>Acute phase clinical characteristics</b> |                    |                          |         |
| Stroke subtype: Haemorrhagic                | 111 (26.6)         | 656 (15.8)               | <0.001  |
| Glasgow coma scale <13                      | 128 (32.9)         | 632 (15.6)               | <0.001  |
| Swallowing test failed                      | 159 (47.6)         | 913 (24.0)               | <0.001  |
| Incontinence                                | 177 (50.9)         | 1291 (31.9)              | <0.001  |
| Pre-stroke BI<15                            | 22 (5.7)           | 200 (4.9)                | 0.596   |
| Post-stroke (7d) BI<15                      | 115 (60.5)         | 1805 (48.2)              | 0.001   |
| NIHSS (median (IQR))                        | 6 (4-15)           | 5 (3-9)                  | 0.055   |
| <b>Acute phase process of care</b>          |                    |                          |         |
| Admission to a stroke unit                  | 130 (32.7)         | 2991 (71.8)              | <0.001  |
| Thrombolysis (if ischaemic)                 | 12 (25.5)          | 303 (13.3)               | 0.027   |
| Brain imaging                               |                    |                          | <0.001  |
| No scan                                     | 30 (7.9)           | 19 (0.5)                 |         |
| CT only                                     | 321 (84.0)         | 2695 (71.4)              |         |
| MRI only/with CT                            | 31 (8.1)           | 1060 (28.1)              |         |
| Length of stay, days (median (IQR))         | 16 (6-38)          | 14 (5-43)                | 0.803   |
| <b>Pre-stroke risk factors</b>              |                    |                          |         |
| Hypertension                                | 178 (54.3)         | 2718 (66.3)              | <0.001  |
| Transient ischemic attack                   | 28 (8.2)           | 457 (11.2)               | 0.109   |
| Atrial fibrillation                         | 63 (18.4)          | 627 (15.4)               | 0.164   |
| Myocardial infarction                       | 30 (8.7)           | 416 (10.2)               | 0.422   |
| Diabetes                                    | 66 (19.1)          | 913 (22.3)               | 0.188   |
| Consumes alcohol (>1 unit per week)         | 177 (55.7)         | 2198 (56.8)              | 0.735   |
| Smoking status                              |                    |                          | <0.001  |
| Never                                       | 141 (37.0)         | 1543 (38.8)              |         |
| Ex-smoker                                   | 64 (16.8)          | 1244 (31.3)              |         |
| Current                                     | 176 (46.2)         | 1192 (30.0)              |         |

Missingness in the outcome, discharge destination, is 9.4%. We constructed a binary variable to indicate whether the outcome was missing (431 patients) or non-missing (4,172). Table I shows the differences in characteristics between these two groups. Compared to those with non-missing outcome, those with missing data were more likely to: be from the earliest cohort (68.9 vs. 20.1%,  $p<0.001$ ), be older (mean age 69.7 vs 67.6,  $p=0.005$ ), be White (76.1 vs. 62.6%,  $p<0.001$ ), have a haemorrhagic stroke (26.6 vs. 15.8%,  $p<0.001$ ), have a GCS<13 (32.9 vs. 15.6%,  $p<0.001$ ), fail their swallowing test (47.6 vs. 24.0%,  $p<0.001$ ), be incontinent (50.9 vs. 31.9%,  $p<0.001$ ), have a post-stroke 7d BI<15 (60.5 vs. 48.2%,  $p=0.001$ ), have no brain imaging done (7.9 vs. 0.5%,  $p<0.001$ ), have thrombolysis (25.5 vs. 13.3%,  $p=0.027$ ) and be a current smoker (46.2 vs. 29.4%,  $p<0.001$ ). They are also less likely to: be admitted to a stroke unit (32.7 vs. 71.8%,  $p<0.001$ ), have an MRI scan (8.1 vs. 28.1%,  $p<0.001$ ), and have hypertension (54.3 vs. 66.3%,  $p<0.001$ ). This suggests that those with missing outcome data have poorer functional outcomes and poorer care. Their characteristics are generally more similar to those who were discharged to a care home.

Table II. Level of missingness in each variable, stratified by outcome

| Factor                                      | Missingness (%) for discharge to: |                       | P-value |
|---------------------------------------------|-----------------------------------|-----------------------|---------|
|                                             | Care home<br>(N=484)              | Own home<br>(N=3,441) |         |
| Year of stroke                              | 0 (0.0)                           | 0 (0.0)               | N/A     |
| Age                                         | 0 (0.0)                           | 0 (0.0)               | N/A     |
| Sex                                         | 0 (0.0)                           | 0 (0.0)               | N/A     |
| Ethnicity                                   | 3 (0.6)                           | 37 (1.1)              | 0.489   |
| Pre-stroke living arrangement               | 50 (10.3)                         | 199 (5.8)             | <0.001  |
| <b>Acute phase clinical characteristics</b> |                                   |                       |         |
| Stroke subtype                              | 5 (1.0)                           | 11 (0.3)              | 0.054   |
| Glasgow coma score                          | 22 (4.5)                          | 81 (2.4)              | 0.008   |
| Swallowing test                             | 24 (5.0)                          | 316 (9.2)             | 0.003   |
| Incontinence                                | 19 (3.9)                          | 98 (2.8)              | 0.245   |
| Pre-stroke Barthel Index                    | 21 (4.3)                          | 79 (2.3)              | 0.012   |
| Post-stroke (7d) Barthel Index              | 51 (10.5)                         | 344 (10.0)            | 0.772   |
| NIHSS                                       | 22 (12.3)                         | 242 (10.3)            | 0.484   |
| <b>Acute phase process of care</b>          |                                   |                       |         |
| Admission to stroke unit                    | 3 (0.6)                           | 3 (0.1)               | 0.029   |
| Thrombolysis (if ischaemic)                 | 1 (0.6)                           | 14 (0.7)              | 0.999   |
| Brain imaging                               | 0 (0.0)                           | 8 (0.2)               | 0.601   |
| Length of stay                              | 17 (3.5)                          | 80 (2.3)              | 0.156   |
| <b>Pre-stroke risk factors</b>              |                                   |                       |         |
| Hypertension                                | 14 (2.9)                          | 53 (1.5)              | 0.050   |
| Transient ischemic attack (TIA)             | 17 (3.5)                          | 66 (1.9)              | 0.035   |
| Atrial fibrillation                         | 19 (3.9)                          | 76 (2.2)              | 0.032   |
| Myocardial infarction                       | 18 (3.7)                          | 88 (2.6)              | 0.185   |
| Diabetes                                    | 14 (2.9)                          | 56 (1.6)              | 0.074   |
| Consumes alcohol                            | 57 (11.8)                         | 224 (6.5)             | <0.001  |
| Smoking status                              | 39 (8.1)                          | 134 (3.9)             | <0.001  |

The other missingness of interest is that in each variable. Therefore, we looked at whether there were differences in the outcome in those with and without missing data for each variable. Those discharged to care homes had higher levels of missingness in: pre-stroke living arrangements (10.3 vs. 5.8%,  $p<0.001$ ), GCS score (4.5 vs. 2.4%,  $p=0.008$ ), pre-stroke BI (4.3 vs. 2.3%,  $p=0.012$ ), admission to a stroke unit (0.6 vs. 0.1%,  $p=0.029$ ), hypertension (2.9 vs. 1.5%,  $p=0.050$ ), TIA (3.5 vs. 1.9%,  $p=0.035$ ), atrial fibrillation (3.9 vs. 2.2%,  $p=0.032$ ), alcohol consumption (11.8 vs 6.5%,  $p<0.001$ ) and smoking status (8.1 vs. 3.9%,  $p<0.001$ ) compared to those discharged to their own home. Those discharged to care homes had fewer missing data in swallowing test result results (5.0 vs. 9.2%,  $p=0.003$ ) than those discharged to their own homes.

Table III. The characteristics of the whole population of stroke survivors, stratified by year of stroke

| Factor                                      | Cohort               |                       |                       |                       | P-value |
|---------------------------------------------|----------------------|-----------------------|-----------------------|-----------------------|---------|
|                                             | 1995-2000<br>(N=840) | 2001-2006<br>(N=1215) | 2007-2012<br>(N=1116) | 2013-2018<br>(N=1001) |         |
| Age (mean (SD))                             | 68.7 (13.9)          | 67.3 (15.1)           | 67.5 (15.8)           | 67.0 (15.9)           | 0.096   |
| Sex: Male                                   | 434 (51.7)           | 655 (53.9)            | 606 (54.3)            | 560 (55.9)            | 0.333   |
| Ethnicity                                   |                      |                       |                       |                       | <0.001  |
| White                                       | 598 (71.4)           | 776 (65.4)            | 669 (60.5)            | 539 (54.3)            |         |
| Black                                       | 189 (22.6)           | 317 (26.7)            | 356 (32.2)            | 384 (38.7)            |         |
| Other                                       | 50 (6.0)             | 93 (7.8)              | 81 (7.3)              | 70 (7.0)              |         |
| Living alone pre-stroke                     | 256 (39.7)           | 410 (34.5)            | 366 (33.5)            | 372 (38.4)            | 0.017   |
| <b>Acute phase clinical characteristics</b> |                      |                       |                       |                       |         |
| Stroke subtype: Haemorrhagic                | 164 (19.9)           | 187 (15.4)            | 138 (12.4)            | 167 (16.7)            | <0.001  |
| Glasgow coma scale <13                      | 121 (14.5)           | 162 (13.8)            | 194 (18.0)            | 155 (15.9)            | 0.037   |
| Swallowing test failed                      | 298 (36.4)           | 297 (27.0)            | 190 (19.5)            | 128 (14.1)            | <0.001  |
| Incontinence                                | 324 (39.4)           | 416 (35.4)            | 295 (27.3)            | 256 (26.3)            | <0.001  |
| Pre-stroke Barthel Index <15                | 28 (3.4)             | 45 (3.8)              | 53 (5.0)              | 74 (7.7)              | <0.001  |
| Post-stroke (7d) Barthel Index <15          | 459 (64.3)           | 545 (48.4)            | 387 (40.2)            | 414 (43.8)            | <0.001  |
| NIHSS (median (IQR))                        | -                    | -                     | 5.0 (3.0-10.0)        | 4.0 (2.0-8.2)         | <0.001  |
| <b>Acute phase process of care</b>          |                      |                       |                       |                       |         |
| Admission to a stroke unit                  | 248 (29.6)           | 944 (78.0)            | 967 (86.6)            | 832 (83.1)            | <0.001  |
| Thrombolysis (if ischaemic)                 | -                    | -                     | 164 (17.0)            | 110 (13.3)            | 0.035   |
| Brain imaging                               |                      |                       |                       |                       | <0.001  |
| No scan                                     | 14 (1.7)             | 3 (0.2)               | 1 (0.1)               | 1 (0.1)               |         |
| CT only                                     | 700 (84.8)           | 900 (74.9)            | 602 (62.3)            | 493 (63.2)            |         |
| MRI / MRI and CT                            | 111 (13.5)           | 299 (24.9)            | 364 (37.6)            | 286 (36.7)            |         |
| Length of stay (days, median (IQR))         | 31.0 (13.0-68.0)     | 17.0 (7.0-50.0)       | 9.0 (3.0-27.0)        | 8.0 (3.0-25.0)        | <0.001  |
| <b>Pre-stroke risk factors</b>              |                      |                       |                       |                       |         |
| Hypertension                                | 544 (68.3)           | 782 (64.7)            | 721 (65.4)            | 671 (67.6)            | 0.286   |
| Transient ischaemic attack (TIA)            | 138 (17.3)           | 150 (12.4)            | 89 (8.2)              | 80 (8.1)              | <0.001  |
| Atrial fibrillation                         | 124 (15.5)           | 141 (11.7)            | 166 (15.2)            | 196 (20.1)            | <0.001  |
| Myocardial infarction                       | 91 (11.4)            | 108 (8.9)             | 98 (9.0)              | 119 (12.3)            | 0.022   |
| Diabetes                                    | 141 (17.6)           | 250 (20.9)            | 249 (22.5)            | 273 (27.6)            | <0.001  |
| Consumes alcohol (>1 unit per week)         | 506 (66.1)           | 708 (61.8)            | 525 (50.9)            | 459 (49.6)            | <0.001  |
| Smoking status                              |                      |                       |                       |                       | <0.001  |
| Never                                       | 285 (34.5)           | 430 (36.8)            | 418 (39.6)            | 410 (44.1)            |         |
| Ex-smoker                                   | 224 (27.2)           | 383 (32.8)            | 332 (31.5)            | 305 (32.8)            |         |
| Current                                     | 316 (38.3)           | 356 (30.5)            | 305 (28.9)            | 215 (23.1)            |         |

Table IV: The associations between demographic and stroke characteristics and discharge destination post-stroke, in the 1995-2000 cohort of patients

| Factor                                             | Those discharged to (%): |                      | Adjusted*         |         |
|----------------------------------------------------|--------------------------|----------------------|-------------------|---------|
|                                                    | Private home<br>(N=548)  | Care home<br>(N=174) | OR (95% CI)       | P-value |
| Age (mean (SD))                                    | 66.9 (14.0)              | 72.6 (13.4)          | 1.05 (1.02-1.07)  | <0.001  |
| Sex: Female                                        | 246 (44.9)               | 90 (51.7)            | 1.06 (0.64-1.74)  | 0.834   |
| Ethnicity                                          |                          |                      |                   |         |
| White                                              | 385 (70.3)               | 130 (74.7)           | -                 | -       |
| Black                                              | 128 (23.4)               | 36 (20.7)            | 0.86 (0.44-1.65)  | 0.647   |
| Other                                              | 35 (6.4)                 | 8 (4.6)              | 0.51 (0.15-1.52)  | 0.246   |
| Pre-stroke living arrangements                     |                          |                      |                   |         |
| With others                                        | 251 (45.8)               | 88 (50.6)            | -                 | -       |
| Alone                                              | 170 (31.0)               | 63 (36.2)            | 0.99 (0.57-1.70)  | 0.965   |
| Unknown                                            | 127 (23.2)               | 23 (13.2)            | 0.88 (0.26-2.96)  | 0.841   |
| <b>Acute phase clinical characteristics</b>        |                          |                      |                   |         |
| Stroke subtype: Haemorrhagic                       | 107 (19.5)               | 33 (19.0)            | 0.82 (0.43-1.54)  | 0.550   |
| Glasgow coma scale: <13                            | 56 (10.2)                | 48 (27.6)            | 1.37 (0.73-2.57)  | 0.330   |
| Swallow test: Failed                               | 143 (26.1)               | 117 (67.2)           | 1.72 (1.01-2.94)  | 0.045   |
| Incontinent                                        | 149 (27.2)               | 127 (73.0)           | 2.38 (1.37-4.14)  | 0.002   |
| Pre-stroke BI: <15                                 | 13 (2.4)                 | 9 (5.2)              | 1.11 (0.31-3.79)  | 0.872   |
| Post-stroke (7d) BI: <15                           | 252 (46.0)               | 149 (85.6)           | 1.19 (0.54-2.74)  | 0.677   |
| Unknown                                            | 79 (14.4)                | 13 (7.5)             | 0.76 (0.19-3.05)  | 0.703   |
| <b>Acute phase process of care</b>                 |                          |                      |                   |         |
| Admission to a stroke unit                         | 155 (28.3)               | 58 (33.3)            | 0.90 (0.50-1.59)  | 0.712   |
| Brain imaging                                      |                          |                      |                   |         |
| CT only                                            | 453 (82.7)               | 157 (90.2)           | -                 | -       |
| MRI only/with CT                                   | 84 (15.3)                | 16 (9.2)             | 0.92 (0.38-2.11)  | 0.839   |
| Unknown                                            | 11 (2.0)                 | 1 (0.6)              | 0.37 (0.02-3.18)  | 0.434   |
| Length of stay in hospital<br>(days, median (IQR)) | 21.0 (10.0-46.0)         | 90.0 (61.3-117.5)    | 1.04 (1.03-1.05)  | <0.001  |
| <b>Pre-stroke risk factors</b>                     |                          |                      |                   |         |
| Hypertension                                       | 356 (65.0)               | 118 (67.8)           | 1.09 (0.64-1.87)  | 0.757   |
| Unknown                                            | 23 (4.2)                 | 5 (2.9)              | 1.61 (0.30-8.05)  | 0.569   |
| Transient ischemic attack (TIA)                    | 95 (17.3)                | 29 (16.7)            | 0.70 (0.36-1.35)  | 0.296   |
| Unknown                                            | 19 (3.5)                 | 6 (3.4)              | 1.91 (0.40-8.97)  | 0.411   |
| Atrial fibrillation                                | 77 (14.1)                | 24 (13.8)            | 0.65 (0.32-1.28)  | 0.218   |
| Unknown                                            | 19 (3.5)                 | 8 (4.6)              | 3.15 (0.74-13.47) | 0.120   |
| Myocardial infarction                              | 58 (10.6)                | 25 (14.4)            | 1.21 (0.57-2.52)  | 0.614   |
| Unknown                                            | 20 (3.6)                 | 7 (4.0)              | 3.04 (0.68-13.02) | 0.137   |
| Diabetes                                           | 94 (17.2)                | 32 (18.4)            | 0.97 (0.49-1.87)  | 0.928   |
| Unknown                                            | 18 (3.3)                 | 5 (2.9)              | 4.76 (0.74-27.92) | 0.090   |
| Alcohol consumption                                |                          |                      |                   |         |
| <1 unit per week                                   | 165 (30.1)               | 62 (35.6)            | -                 | -       |
| >1 unit per week                                   | 340 (62.0)               | 102 (58.6)           | 0.71 (0.41-1.24)  | 0.234   |
| Unknown                                            | 43 (7.8)                 | 10 (5.7)             | 4.08 (0.68-35.76) | 0.151   |
| Smoking status                                     |                          |                      |                   |         |
| Never                                              | 171 (31.2)               | 71 (40.8)            | -                 | -       |
| Ex-smoker                                          | 159 (29.0)               | 46 (26.4)            | 0.62 (0.32-1.17)  | 0.138   |
| Current                                            | 218 (39.8)               | 57 (32.8)            | 0.74 (0.39-1.43)  | 0.370   |

\*Adjusted for year of stroke, age, sex, ethnicity, pre-stroke living arrangement, type of stroke, stroke severity (GCS), swallow test results, incontinence, pre-stroke BI, post-stroke (7d) BI, admission to a stroke unit, brain imaging, and length of stay in hospital

Table V: The associations between demographic and stroke characteristics and discharge destination post-stroke, in the 2001-2006 cohort of patients

| Factor                                             | Those discharged to (%): |                      | Adjusted          |         |
|----------------------------------------------------|--------------------------|----------------------|-------------------|---------|
|                                                    | Private home<br>(N=941)  | Care home<br>(N=129) | OR (95% CI)       | P-value |
| Age (mean (SD))                                    | 66.2 (15.4)              | 75.3 (10.9)          | 1.05 (1.02-1.08)  | <0.001  |
| Sex: Female                                        | 431 (45.8)               | 67 (51.9)            | 0.62 (0.37-1.03)  | 0.066   |
| <b>Ethnicity</b>                                   |                          |                      |                   |         |
| White                                              | 598 (63.5)               | 98 (76.0)            | -                 | -       |
| Black                                              | 262 (27.8)               | 22 (17.1)            | 0.60 (0.30-1.15)  | 0.133   |
| Other                                              | 81 (8.6)                 | 9 (7.0)              | 0.80 (0.27-2.15)  | 0.676   |
| <b>Pre-stroke living arrangements</b>              |                          |                      |                   |         |
| With others                                        | 630 (67.0)               | 60 (46.5)            | -                 | -       |
| Alone                                              | 303 (32.2)               | 65 (50.4)            | 2.04 (1.22-3.46)  | 0.007   |
| Unknown                                            | 8 (0.9)                  | 4 (3.1)              | 6.52 (0.88-47.44) | 0.069   |
| <b>Acute phase clinical characteristics</b>        |                          |                      |                   |         |
| Stroke subtype: Haemorrhagic                       | 148 (15.7)               | 17 (13.2)            | 0.67 (0.29-1.44)  | 0.320   |
| Glasgow coma scale: <13                            | 101 (10.7)               | 48 (37.2)            | 1.89 (1.02-3.50)  | 0.043   |
| Unknown                                            | 21 (2.2)                 | 9 (7.0)              | 3.70 (1.15-11.35) | 0.024   |
| Swallow test: Failed                               | 189 (20.1)               | 75 (58.1)            | 1.41 (0.79-2.50)  | 0.240   |
| Not done                                           | 89 (9.5)                 | 5 (3.9)              | 0.62 (0.14-2.15)  | 0.480   |
| Incontinent                                        | 275 (29.2)               | 93 (72.1)            | 1.05 (0.56-1.95)  | 0.884   |
| Unknown                                            | 28 (3.0)                 | 4 (3.1)              | 0.58 (0.14-1.98)  | 0.416   |
| Pre-stroke BI: <15                                 | 23 (2.4)                 | 14 (10.9)            | 2.21 (0.91-5.35)  | 0.079   |
| Unknown                                            | 9 (1.0)                  | 3 (2.3)              | 1.19 (0.16-8.17)  | 0.861   |
| Post-stroke (7d) BI: <15                           | 372 (39.5)               | 113 (87.6)           | 3.60 (1.45-10.26) | 0.009   |
| Unknown                                            | 63 (6.7)                 | 10 (7.8)             | 5.74 (1.71-20.14) | 0.005   |
| <b>Acute phase process of care</b>                 |                          |                      |                   |         |
| Admission to a stroke unit                         | 738 (78.4)               | 108 (83.7)           | 1.15 (0.58-2.36)  | 0.694   |
| <b>Brain imaging</b>                               |                          |                      |                   |         |
| CT only                                            | 684 (72.7)               | 118 (91.5)           | -                 | -       |
| MRI only/with CT                                   | 257 (27.3)               | 11 (8.5)             | 0.42 (0.17-0.97)  | 0.053   |
| Length of stay in hospital<br>(days, median (IQR)) | 14.0 (6.0-36.0)          | 82.0 (59.0-115.0)    | 1.03 (1.02-1.04)  | <0.001  |
| <b>Pre-stroke risk factors</b>                     |                          |                      |                   |         |
| Hypertension                                       | 614 (65.2)               | 76 (58.9)            | 0.63 (0.38-1.07)  | 0.088   |
| Unknown                                            | 2 (0.2)                  | 2 (1.6)              | 2.38 (0.14-32.15) | 0.504   |
| Transient ischemic attack (TIA)                    | 121 (12.9)               | 9 (7.0)              | 0.30 (0.12-0.69)  | 0.007   |
| Atrial fibrillation                                | 105 (11.2)               | 22 (17.1)            | 0.99 (0.50-1.93)  | 0.981   |
| Myocardial infarction                              | 80 (8.5)                 | 14 (10.9)            | 1.12 (0.47-2.52)  | 0.793   |
| Diabetes                                           | 191 (20.3)               | 28 (21.7)            | 0.85 (0.46-1.53)  | 0.600   |
| Unknown                                            | 11 (1.2)                 | 2 (1.6)              | 0.53 (0.05-4.24)  | 0.561   |
| <b>Alcohol consumption</b>                         |                          |                      |                   |         |
| <1 unit per week                                   | 337 (35.8)               | 52 (40.3)            | -                 | -       |
| >1 unit per week                                   | 557 (59.2)               | 67 (51.9)            | 0.96 (0.55-1.68)  | 0.880   |
| Unknown                                            | 47 (5.0)                 | 10 (7.8)             | 1.68 (0.52-5.04)  | 0.366   |
| <b>Smoking status</b>                              |                          |                      |                   |         |
| Never                                              | 327 (34.8)               | 60 (46.5)            | -                 | -       |
| Ex-smoker                                          | 307 (32.6)               | 37 (28.7)            | 0.82 (0.45-1.50)  | 0.530   |
| Current                                            | 278 (29.5)               | 26 (20.2)            | 0.97 (0.48-1.93)  | 0.941   |
| Unknown                                            | 29 (3.1)                 | 6 (4.7)              | 0.37 (0.09-1.44)  | 0.163   |

\*Adjusted for year of stroke, age, sex, ethnicity, pre-stroke living arrangement, type of stroke, stroke severity (GCS), swallow test results, incontinence, pre-stroke BI, post-stroke (7d) BI, admission to a stroke unit, brain imaging, and length of stay in hospital



Table VI: The associations between demographic and stroke characteristics and discharge destination post-stroke, in the 2007-2012 cohort of patients

| Factor                                             | Those discharged to (%): |                     | Adjusted           |         |
|----------------------------------------------------|--------------------------|---------------------|--------------------|---------|
|                                                    | Private home<br>(N=875)  | Care home<br>(N=90) | OR (95% CI)        | P-value |
| Age (mean (SD))                                    | 65.5 (15.9)              | 80.3 (10.5)         | 1.08 (1.05-1.11)   | <0.001  |
| Sex: Female                                        | 383 (43.8)               | 50 (55.6)           | 0.67 (0.36-1.22)   | 0.189   |
| <b>Ethnicity</b>                                   |                          |                     |                    |         |
| White                                              | 513 (58.6)               | 71 (78.9)           | -                  | -       |
| Black                                              | 300 (34.3)               | 12 (13.3)           | 0.55 (0.25-1.18)   | 0.136   |
| Other                                              | 62 (7.1)                 | 7 (7.8)             | 0.58 (0.17-1.77)   | 0.356   |
| <b>Pre-stroke living arrangements</b>              |                          |                     |                    |         |
| With others                                        | 587 (67.1)               | 48 (53.3)           | -                  | -       |
| Alone                                              | 279 (31.9)               | 38 (42.2)           | 1.58 (0.86-2.89)   | 0.137   |
| Unknown                                            | 9 (1.0)                  | 4 (4.4)             | 2.43 (0.37-14.90)  | 0.340   |
| <b>Acute phase clinical characteristics</b>        |                          |                     |                    |         |
| Stroke subtype: Haemorrhagic                       | 110 (12.6)               | 8 (8.9)             | 0.55 (0.20-1.39)   | 0.223   |
| Glasgow coma scale: <13                            | 119 (13.6)               | 40 (44.4)           | 2.07 (1.04-4.15)   | 0.039   |
| Unknown                                            | 22 (2.5)                 | 6 (6.7)             | 2.88 (0.64-11.97)  | 0.153   |
| Swallow test: Failed                               | 111 (12.7)               | 48 (53.3)           | 2.30 (1.16-4.57)   | 0.017   |
| Not done                                           | 107 (12.2)               | 7 (7.8)             | 1.45 (0.47-4.08)   | 0.499   |
| Incontinent                                        | 169 (19.3)               | 71 (78.9)           | 3.77 (1.93-7.62)   | <0.001  |
| Unknown                                            | 21 (2.4)                 | 2 (2.2)             | 1.18 (0.13-6.30)   | 0.861   |
| Pre-stroke BI: <15                                 | 29 (3.3)                 | 10 (11.1)           | 0.54 (0.19-1.45)   | 0.234   |
| Unknown                                            | 29 (3.3)                 | 9 (10.0)            | 2.04 (0.64-6.16)   | 0.213   |
| Post-stroke (7d) BI: <15                           | 239 (27.3)               | 74 (82.2)           | 10.58 (3.63-40.25) | <0.001  |
| Unknown                                            | 117 (13.4)               | 12 (13.3)           | 5.44 (1.46-23.84)  | 0.015   |
| <b>Acute phase process of care</b>                 |                          |                     |                    |         |
| Admission to a stroke unit                         | 772 (88.2)               | 80 (88.9)           | 0.97 (0.41-2.45)   | 0.949   |
| <b>Brain imaging</b>                               |                          |                     |                    |         |
| CT only                                            | 470 (53.7)               | 57 (63.3)           | -                  | -       |
| MRI only/with CT                                   | 301 (34.4)               | 20 (22.2)           | 0.99 (0.47-2.01)   | 0.973   |
| Unknown                                            | 104 (11.9)               | 13 (14.4)           | 3.43 (1.36-8.53)   | 0.008   |
| Length of stay in hospital<br>(days, median (IQR)) | 7.0 (2.0-20.0)           | 47.0 (32.5-71.75)   | 1.01 (1.01-1.02)   | <0.001  |
| <b>Pre-stroke risk factors</b>                     |                          |                     |                    |         |
| Hypertension                                       | 556 (63.5)               | 66 (73.3)           | 1.09 (0.57-2.14)   | 0.799   |
| Transient ischemic attack (TIA)                    | 69 (7.9)                 | 6 (6.7)             | 1.05 (0.33-2.94)   | 0.935   |
| Unknown                                            | 6 (0.7)                  | 1 (1.1)             | 0.53 (0.01-10.95)  | 0.699   |
| Atrial fibrillation                                | 106 (12.1)               | 30 (33.3)           | 2.20 (1.10-4.42)   | 0.026   |
| Myocardial infarction                              | 77 (8.8)                 | 9 (10.0)            | 0.90 (0.34-2.20)   | 0.822   |
| Unknown                                            | 19 (2.2)                 | 1 (1.1)             | 0.60 (0.02-5.47)   | 0.691   |
| Diabetes                                           | 197 (22.5)               | 12 (13.3)           | 0.58 (0.24-1.29)   | 0.196   |
| <b>Alcohol consumption</b>                         |                          |                     |                    |         |
| <1 unit per week                                   | 392 (44.8)               | 36 (40.0)           | -                  | -       |
| >1 unit per week                                   | 430 (49.1)               | 36 (40.0)           | 1.19 (0.63-2.26)   | 0.601   |
| Unknown                                            | 53 (6.1)                 | 18 (20.0)           | 2.93 (1.11-7.81)   | 0.030   |
| <b>Smoking status</b>                              |                          |                     |                    |         |
| Never                                              | 324 (37.0)               | 38 (42.2)           | -                  | -       |
| Ex-smoker                                          | 263 (30.1)               | 25 (27.8)           | 1.06 (0.52-2.14)   | 0.869   |
| Current                                            | 252 (28.8)               | 13 (14.4)           | 0.63 (0.25-1.47)   | 0.292   |
| Unknown                                            | 36 (4.1)                 | 14 (15.6)           | 3.48 (1.17-10.35)  | 0.024   |

\*Adjusted for year of stroke, age, sex, ethnicity, pre-stroke living arrangement, type of stroke, stroke severity (GCS), swallow test results, incontinence, pre-stroke BI, post-stroke (7d) BI, admission to a stroke unit, brain imaging, and length of stay in hospital

Table VII: The associations between demographic and stroke characteristics and discharge destination post-stroke, in the 2013-2018 cohort of patients

| Factor                                          | Those discharged to (%): |                  | Adjusted          |         |
|-------------------------------------------------|--------------------------|------------------|-------------------|---------|
|                                                 | Private home (N=806)     | Care home (N=39) | OR (95% CI)       | P-value |
| Age (mean (SD))                                 | 66.3 (15.9)              | 75.4 (13.7)      | 1.04 (1.01-1.07)  | 0.022   |
| Sex: Female                                     | 355 (44.0)               | 15 (38.5)        | 0.30 (0.12-0.69)  | 0.007   |
| Ethnicity                                       |                          |                  |                   |         |
| White                                           | 442 (54.8)               | 23 (59.0)        | -                 | -       |
| Black                                           | 304 (37.7)               | 13 (33.3)        | 0.92 (0.38-2.15)  | 0.854   |
| Other                                           | 60 (7.4)                 | 3 (7.7)          | 0.97 (0.14-4.53)  | 0.975   |
| Pre-stroke living arrangements                  |                          |                  |                   |         |
| With others                                     | 500 (62.0)               | 17 (43.6)        | -                 | -       |
| Alone                                           | 289 (35.9)               | 19 (48.7)        | 1.19 (0.52-2.73)  | 0.679   |
| Unknown                                         | 17 (2.1)                 | 3 (7.7)          | 7.61 (1.23-38.14) | 0.018   |
| <b>Acute phase clinical characteristics</b>     |                          |                  |                   |         |
| Stroke subtype: Haemorrhagic                    | 141 (17.5)               | 4 (10.3)         | 0.12 (0.02-0.54)  | 0.014   |
| Glasgow coma scale: <13                         | 120 (14.9)               | 14 (35.9)        | 0.83 (0.30-2.21)  | 0.718   |
| Swallow test: Failed                            | 85 (10.5)                | 18 (46.2)        | 2.43 (0.90-6.57)  | 0.078   |
| Not done                                        | 65 (8.1)                 | 3 (7.7)          | 0.94 (0.11-5.57)  | 0.953   |
| Incontinent                                     | 185 (23.0)               | 27 (69.2)        | 2.24 (0.79-6.61)  | 0.132   |
| Unknown                                         | 21 (2.6)                 | 2 (5.1)          | 5.86 (0.60-37.34) | 0.084   |
| Pre-stroke BI: <15                              | 56 (6.9)                 | 9 (23.1)         | 2.08 (0.66-6.37)  | 0.202   |
| Unknown                                         | 18 (2.2)                 | 2 (5.1)          | 1.49 (0.13-11.45) | 0.720   |
| Post-stroke (7d) BI: <15                        | 307 (38.1)               | 32 (82.1)        | 1.65 (0.44-6.99)  | 0.469   |
| Unknown                                         | 34 (4.2)                 | 3 (7.7)          | 3.70 (0.41-26.48) | 0.211   |
| <b>Acute phase process of care</b>              |                          |                  |                   |         |
| Admission to a stroke unit                      | 686 (85.1)               | 36 (92.3)        | 1.40 (0.30-9.49)  | 0.697   |
| Brain imaging                                   |                          |                  |                   |         |
| CT only                                         | 390 (48.4)               | 24 (61.5)        |                   |         |
| MRI only/with CT                                | 238 (29.5)               | 8 (20.5)         | 0.99 (0.33-2.74)  | 0.992   |
| Unknown                                         | 178 (22.1)               | 7 (17.9)         | 0.61 (0.18-1.78)  | 0.387   |
| Length of stay in hospital (days, median (IQR)) | 7.0 (2.0-21.0)           | 64.0 (47.5-90.0) | 1.03 (1.02-1.04)  | <0.001  |
| <b>Pre-stroke risk factors</b>                  |                          |                  |                   |         |
| Hypertension                                    | 548 (68.0)               | 23 (59.0)        | 0.42 (0.18-0.99)  | 0.046   |
| Transient ischemic attack (TIA)                 | 65 (8.1)                 | 4 (10.3)         | 1.08 (0.21-3.99)  | 0.917   |
| Atrial fibrillation                             | 154 (19.1)               | 12 (30.8)        | 0.85 (0.33-2.05)  | 0.718   |
| Unknown                                         | 21 (2.6)                 | 2 (5.1)          | 0.48 (0.05-3.17)  | 0.487   |
| Myocardial infarction                           | 96 (11.9)                | 5 (12.8)         | 0.59 (0.17-1.72)  | 0.364   |
| Diabetes                                        | 226 (28.0)               | 12 (30.8)        | 0.83 (0.34-1.94)  | 0.674   |
| Alcohol consumption                             |                          |                  |                   |         |
| <1 unit per week                                | 390 (48.4)               | 17 (43.6)        | -                 | -       |
| >1 unit per week                                | 366 (45.4)               | 12 (30.8)        | 1.07 (0.41-2.78)  | 0.896   |
| Unknown                                         | 50 (6.2)                 | 10 (25.6)        | 2.20 (0.71-6.56)  | 0.162   |
| Smoking status                                  |                          |                  |                   |         |
| Never                                           | 341 (42.3)               | 14 (35.9)        | -                 | -       |
| Ex-smoker                                       | 253 (31.4)               | 7 (17.9)         | 0.68 (0.21-2.03)  | 0.493   |
| Current                                         | 166 (20.6)               | 9 (23.1)         | 2.41 (0.75-7.78)  | 0.135   |
| Unknown                                         | 46 (5.7)                 | 9 (23.1)         | 1.62 (0.51-4.94)  | 0.401   |

\*Adjusted for year of stroke, age, sex, ethnicity, pre-stroke living arrangement, type of stroke, stroke severity (GCS), swallow test results, incontinence, pre-stroke BI, post-stroke (7d) BI, admission to a stroke unit, brain imaging, and length of stay in hospital
